# Supplementary material
Source: publisher site journal article supplement (https://www.dovepress.com/article/450318)
Supplement: Supplementary file 1 [file get_supplementary_file.php]

**Supplementary Online Content**

Evaluation of the prognostic role of neutrophil-lymphocyte ratio, C-reactive protein-albumin ratio, and platelet-lymphocyte ratio in patients with the co-presentation of coronary artery disease and COVID-19

**Catalogue**

[Appendix 1. Diagnostic basis for diseases included in this study 3](#_Toc1233690509)

[Supplemental Figure 1. Flow diagram for recruitment of patients 6](#_Toc681772978)

[Supplemental Table 1. Statistics of missing value and extremesa 7](#_Toc1733184501)

[Supplemental Table 2. ROC analysis of in-hospital all-cause death 8](#_Toc1163720399)

[Supplementary Table 3. Pairwise comparison of ROC in-hospital all-cause death 9](#_Toc1515172764)

[Supplementary Table 4. Cox regression analysis of cardiovascular death during hospitalization 10](#_Toc647558422)

[Supplementary Table 5. Cox regression analysis of respiratory failure death during hospitalization 11](#_Toc67275558)

[Supplementary Table 6. Subgroup analyses for the primary outcome for three scores. 12](#_Toc1123904984)

[Supplementary Table 7. Clinical characteristics of propensity score matched patient pairs based on NLR 13](#_Toc204907076)

[Supplementary Table 8. Clinical characteristics of propensity score matched patient pairs based on CAR 14](#_Toc1456940191)

[Supplementary Table 9. Clinical characteristics of propensity score matched patient pairs based on PLR 15](#_Toc1185247043)

[Supplementary Table 10. Clinical characteristics of NLR, CAR, and PLR stratification in post hoc analysis 16](#_Toc388742129)

[Supplementary Table 11. Cox regression analysis of all-cause death during hospitalization using post hoc analysis model 17](#_Toc943707929)

[Supplementary Table 12. Cox regression analysis of all-cause death during hospitalization after removal of CAR 18](#_Toc1732429608)

## **Appendix 1. Diagnostic basis for diseases included in this study**

**Acute coronary syndrome**

The diagnostic criteria for acute coronary syndrome are divided into acute myocardial infarction and unstable angina. Firstly, the diagnostic criteria for acute myocardial infarction refer to the fourth universal definition of myocardial infarction (DOI: 10.1093/eurheartj/ehy462), as follows,

The term acute myocardial infarction should be used when there is acute myocardial injury with clinical evidence of acute myocardial ischaemia and with detection of a rise and/or fall of cTn values with at least one value above the 99th percentile URL and at least one of the following:

• Symptoms of myocardial ischaemia;

• New ischaemic electrocardiogram changes;

• Development of pathological Q waves;

• Imaging evidence of new loss of viable myocardium or new regional wall motion abnormality in a pattern consistent with an ischaemic aetiology;

• Identification of a coronary thrombus by angiography or autopsy (not for type 2 or 3 MIs).

Unstable angina pectoris is believed to have acute myocardial injury in patients, but the dynamic changes in cTn values were not clearly defined at the time of admission, and there were no dynamic changes in cTn values during hospitalization, and at least one of the following situations occurred:

• Symptoms of myocardial ischaemia;

• New ischaemic electrocardiogram changes;

• Development of pathological Q waves;

• Imaging evidence of new loss of viable myocardium or new regional wall motion abnormality in a pattern consistent with an ischaemic aetiology;

• Identification of a coronary thrombus by angiography or autopsy (not for type 2 or 3 MIs).

**Chronic coronary syndrome**

The diagnostic criteria for chronic coronary syndrome refer to the 2019 ESC Guidelines for the diagnosis and management of chronic coronary syndromes (DOI: 10.1093/eurheartj/ehz425), which include the following populations: (1) suspected coronary heart disease, accompanied by stable angina symptoms and/or chest tightness; (2) New onset heart failure or left ventricular dysfunction may be coronary heart disease; (3) Less than 1 year after ACS or coronary revascularization, asymptomatic or asymptomatic stable; (4) >1 year after initial diagnosis or revascularization; (5) Suspect angina caused by vascular spasm or microvascular disease; (6) Asymptomatic coronary heart disease patients discovered during screening.

**COVID-19**

All COVID patients included in this study is confirmed cases.

• Suspected case: Has any one of the epidemiological history and meets any two of the clinical manifestations; Those without a clear epidemiological history meet the three clinical manifestations. Epidemiological history: ① Contact history with COVID-19 patients or SARS-CoV-2 infected individuals 14 days prior to onset; ② 14 days prior to the onset of COVID-19, there was a history of travel or residence in COVID-19 endemic areas; ③ Patients who have been in contact with COVID-19 prevalent areas with fever or respiratory symptoms 14 days before the onset of the disease. Clinical manifestations: ① Fever and/or respiratory symptoms, abnormal smell/taste, or other related symptoms; ② Having COVID-19 pulmonary imaging manifestations; ③ In the early stage of the disease, the total number of white blood cells is normal or reduced, and the lymphocyte count is normal or reduced.

• Confirmed cases: Suspected cases with any of the following conditions simultaneously: ① Positive SARS-CoV-2 nucleic acid test in sputum, nasopharyngeal swabs, lower respiratory tract secretions, and other samples by RT-PCR; ② Virus gene sequencing, highly homologous to known SARS-CoV-2; ③ Positive serum SARS-CoV-2 specific IgM antibody; ④ The double serum SARS-CoV-2 specific IgG antibodies in the acute and recovery phases increased by four times or more.

**Congestive heart failure**

Congestive heart failure requires at least one sign (dependent edema,, rales) or one symptom (shortness of breath, or thopnea, paroxysmal nocturnal dyspnea), plus either:

One positive diagnostic test, such as:

• BNP >100 pg/ml

• NT-pro BNP >1,800 pg/ml

• chest X-ray showing pulmonary congestion, edema or pleural effusion

Or

• Needing diuretic, nitrate or inotropic agent to treat the heart failure

**Cerebrovascular disease**

Cerebrovascular disease includes stroke and intracranial hemorrhage, and was confirmed through the diagnosis report in the discharge summary.

**Connective tissue disease**

Connective tissue disease mainly includes systemic lupus erythematosus, Sjogren's syndrome, rheumatoid arthritis, dermatomyositis, scleroderma, polymyositis, ankylosing spondylitis, gouty arthritis, rheumatoid arthritis, serum negative spondyloarthropathy, etc, and was confirmed through the diagnosis report in the discharge summary.

**Moderate/severe nephropathy**

Moderate / severe nephropathy is defined as GFR < 60 min*1.73m2, the calculation of GFR refers to the method of levey et al ( DOI: 10.7326/0003-4819-130-6-199903160-00002). The specific formula is as follows:

170✖([creatinine(md/dl)]-0.999)✖([Age(year)]-0.176)✖([urea nitrogen(md/dl)]-0.17)✖([serum albumin(g/dl)]0.318)✖(0.762 if patient is female)

**Liver dysfunction**

Liver dysfunction includes mild liver dysfunction and moderate / severe liver dysfunction.

• Mild liver dysfunction s defined as a diagnosis of ALT greater than 3 times the upper limit of normal, or liver function impairment in the discharge summary.

• Moderate / severe liver dysfunction is defined as cirrhosis or liver failure in the discharge summary.

**All-cause death**

All cause death is defined as death from any cause.

**Cardiovascular death**

Cardiovascular death is defined as a death for which a definite non-cardiovascular cause (e.g. cancer) has not been identified. Uncertain causes of deaths arepresumed to be cardiovascular unless proven otherwise.

**Respiratory failure death**

Respiratory failure is defined as a death caused by severe pneumonia or acute respiratory failure in the first three diagnoses of the discharge diagnosis report, and excluding clear cardiovascular causes (such as acute myocardial infarction).

**Other diseases included in this study**

The diagnosis basis of other diseases included in this study is based on the diagnosis report in the discharge summary.

## **Supplemental Figure 1. Flow diagram for recruitment of patients**


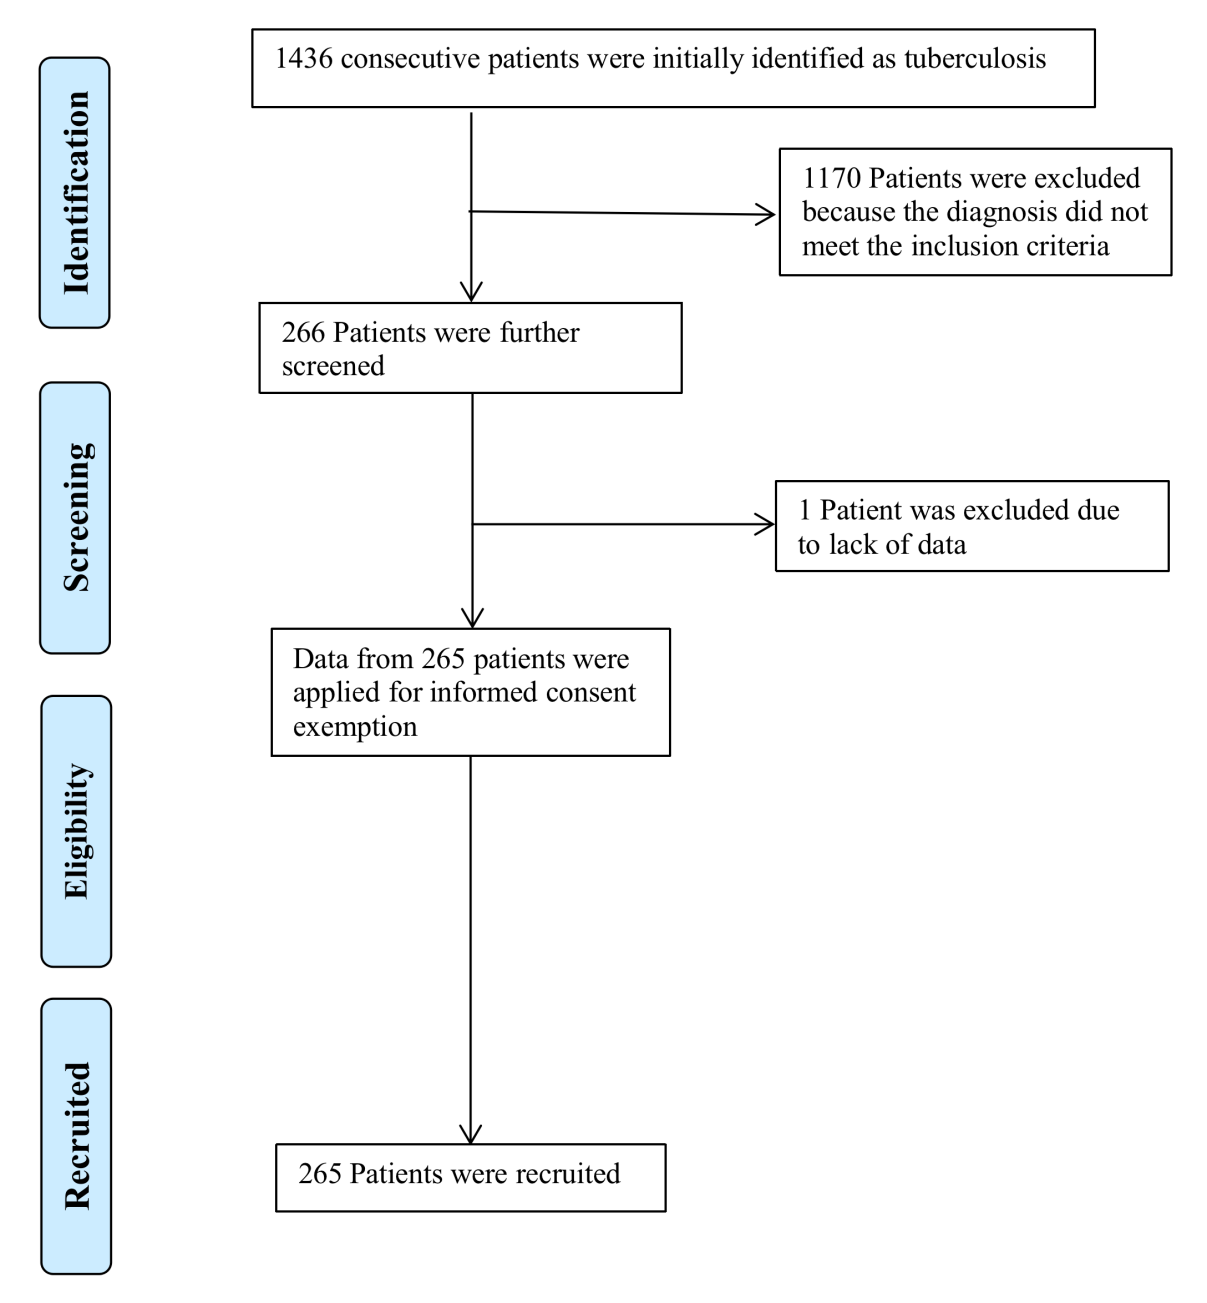


Supplementary Figure 1. Flow diagram for recruitment of patients.

## **Supplemental Table 1. Statistics of missing value and extremesa**

| **Supplementary Table 1. Statistics of missing value and extremesa** | | | | | | | |
| --- | --- | --- | --- | --- | --- | --- | --- |
|  | N | Mean | Std. Deviation | Missing | | No. of Extremesa | |
| Count | Percent | Low | High |
| Alanine aminotransferase | 264 | 28.39 | 26.709 | 1 | 0.4 | 0 | 24 |
| Gender coefficient | 265 | 0.90660 | 0.116434 | 0 | 0.0 | 0 | 0 |
| Creatinine | 264 | 124.2461 | 119.25524 | 1 | 0.4 | 0 | 27 |
| Age | 265 | 83.61 | 9.584 | 0 | 0.0 | 2 | 0 |
| Urea | 264 | 9.2653 | 7.90761 | 1 | 0.4 | 0 | 18 |
| Albumin | 264 | 34.3320 | 5.12781 | 1 | 0.4 | 0 | 0 |
| a. Number of cases outside the range (Q1 - 1.5*IQR, Q3 + 1.5*IQR). | | | | | | | |

Supplemental Table 1. Statistics of missing value and extremesa.

## **Supplemental Table 2. ROC analysis of in-hospital all-cause death**

| Supplementary Table 2. ROC analysis of in-hospital all-cause death. | | | |
| --- | --- | --- | --- |
| Variable | AUC | CI | *P* |
| NLR | 0.686 | 0.592-0.781 | <0.001 |
| CAR | 0.749 | 0.667-0.832 | <0.001 |
| PLR | 0.571 | 0.455-0.687 | 0.232 |

Supplementary Table 2. ROC analysis of in-hospital all-cause death. AUC: area under the curve; CAR: c-reactive protein-to-albumin ratio, CI: confidence interval; NLR: neutrophil-to-lymphocyte ratio, PLR: platelet-to-lymphocyte ratio, ROC: receiver operating characteristic curves.

## **Supplementary Table 3. Pairwise comparison of ROC in-hospital all-cause death**

| Supplementary Table 3. Pairwise comparison of ROC in-hospital all-cause death. | | | |
| --- | --- | --- | --- |
| Variable pairs | AUC Difference | CI | *P* |
| NLR-PLR | -0.116 | -0.221--0.01 | 0.031 |
| NLR-CAR | 0.063 | -0.05-0.176 | 0.275 |
| PLR-CAR | -0.179 | -0.318--0.039 | 0.012 |

Supplementary Table 3. Pairwise comparison of ROC in-hospital all-cause death. AUC: area under the curve; CAR: c-reactive protein-to-albumin ratio, CI: confidence interval; NLR: neutrophil-to-lymphocyte ratio, PLR: platelet-to-lymphocyte ratio, ROC: receiver operating characteristic curves.

## **Supplementary Table 4. Cox regression analysis of cardiovascular death during hospitalization**

| Variable | HR | Univariate analysis for 95% CI | *P* | HR | Multivariate analysis* for 95% CI | *P* |
| --- | --- | --- | --- | --- | --- | --- |
| NLR (*P for trend*) | 1.699 | 0.869-3.321 | 0.121 | - | - | 0.368 |
| CAR (*P for trend*) | 5.712 | 1.618-20.165 | 0.007 | 5.712 | 1.618-20.165 | 0.007 |
| PLR (*P for trend*) | 1.566 | 0.825-2.972 | 0.170 | - | - | 0.265 |
| Age | 1.008 | 0.928-1.095 | 0.843 | - | - | 0.854 |
| sex | 1.547 | 0.385-6.217 | 0.538 | - | - | 0.817 |
| Previous MI | 1.694 | 0.344-8.332 | 0.517 | - | - | 0.995 |
| CHF | 4.785 | 0.598-38.309 | 0.140 | - | - | 0.269 |
| PVD | 0.473 | 0.059-3.800 | 0.481 | - | - | 0.637 |
| CBVD | 0.152 | 0.019-1.228 | 0.077 | - | - | 0.077 |
| Hemiplegia | 0.048 | 0.000-10282019 | 0.782 | - | - | 0.857 |
| Dementia | 0.863 | 0.176-4.225 | 0.856 | - | - | 0.799 |
| COPD/asthma | 0.387 | 0.048-3.100 | 0.371 | - | - | 0.259 |
| CTD | 0.046 | 0.000-58051.766 | 0.668 | - | - | 0.525 |
| UD | 0.048 | 0.000-1.347E+9 | 0.805 | - | - | 0.920 |
| Hypertension | 0.656 | 0.164-2.628 | 0.52 | - | - | 0.677 |
| Diabetes | 0.562 | 0.208-1.519 | 0.256 | - | - | 0.604 |
| Moderate/severe nephropathy | 3.682 | 0.763-17.769 | 0.105 | - | - | 0.151 |
| Liver disease | 2.859 | 1.191-6.866 | 0.019 | - | - | 0.177 |
| Tumor | 0.525 | 0.093-2.981 | 0.467 | - | - | 0.928 |
| Leukemia | 0.049 | 0.000-3.000E+33 | 0.941 | - | - | 0.971 |
| Lymphoma | 0.048 | 0.000-1.976E+9 | 0.808 | - | - | 0.760 |
| AIDS | 0.049 | 0.000-5.813E+27 | 0.930 | - | - | 0.966 |

Supplementary Table 4. Cox regression analysis of cardiovascular death during hospitalization. *Adjusting NLR, CAR, PLR, age, sex, previous MI, CHF, PVD, CBVD, hemiplegia, dementia, COPD/asthma, CTD, UD, hypertension, diabetes, moderate/severe nephropathy, liver dysfunction, tumor, leukemia, lymphoma, and AIDS through forward likelihood ratio method. AIDS: acquired immune deficiency syndrome, CAR: c-reactive protein-to-albumin ratio, CBVD: cerebral vascular disease, CHF: congestive heart failure, CI, confidence interval, COPD: chronic obstructive pulmonary disease, CTD: connective tissue disease, HR: hazard ratio, MI: myocardial infarction, NLR: neutrophil-to-lymphocyte ratio, PLR: platelet-to-lymphocyte ratio, PVD: peripheral vascular disease, UD: ulcer disease.

## **Supplementary Table 5. Cox regression analysis of respiratory failure death during hospitalization**

| Variable | HR | Univariate analysis for 95% CI | *P* | HR | Multivariate analysis* for 95% CI | *P* |
| --- | --- | --- | --- | --- | --- | --- |
| NLR (*P for trend*) | 1.693 | 1.086-2.640 | 0.02 | - | - | 0.124 |
| CAR (*P for trend*) | 1.953 | 1.260-3.028 | 0.003 | 2.060 | 1.318-3.218 | 0.002 |
| PLR (*P for trend*) | 1.087 | 0.739-1.598 | 0.673 | - | - | 0.817 |
| Age | 1.044 | 0.978-1.114 | 0.197 | - | - | 0.399 |
| sex | 2.231 | 0.816-6.097 | 0.118 | - | - | 0.260 |
| Previous MI | 0.302 | 0.040-2.54 | 0.243 | - | - | 0.147 |
| CHF | 5.232 | 1.217-22.483 | 0.026 | - | - | 0.076 |
| PVD | 1.680 | 0.643-4.390 | 0.290 | - | - | 0.789 |
| CBVD | 0.759 | 0.309-1.866 | 0.548 | - | - | 0.436 |
| Hemiplegia | 0.048 | 0.000-197842.150 | 0.696 | - | - | 0.691 |
| Dementia | 0.740 | 0.247-2.217 | 0.590 | - | - | 0.762 |
| COPD/asthma | 1.039 | 0.402-2.687 | 0.938 | - | - | 0.998 |
| CTD | 0.047 | 0.000-937.258 | 0.544 | - | - | 0.241 |
| UD | 0.049 | 0.000-23961383.3 | 0.767 | - | - | 0.792 |
| Hypertension | 0.566 | 0.234-1.368 | 0.206 | - | - | 0.161 |
| Diabetes | 1.395 | 0.866-2.247 | 0.172 | 1.638 | 0.993-2.699 | 0.053 |
| Moderate/severe nephropathy | 4.165 | 11.391-12.472 | 0.011 | 3.689 | 1.227-11.091 | 0.02 |
| Liver dysfunction | 1.933 | 0.897-4.168 | 0.093 | - | - | 0.289 |
| Tumor | 0.077 | 0.002-3.547 | 0.189 | - | - | 0.100 |
| Leukemia | 0.049 | 0.000-1.392*1026 | 0.926 | - | - | 0.957 |
| Lymphoma | 0.043 | 0.000-156771.645 | 0.683 | - | - | 0.555 |
| AIDS | 0.049 | 0.000-1.261*1014 | 0.868 | - | - | 0.853 |

Supplementary Table 5. Cox regression analysis of respiratory failure death during hospitalization. *Adjusting NLR, CAR, PLR, age, sex, previous MI, CHF, PVD, CBVD, hemiplegia, dementia, COPD/asthma, CTD, UD, hypertension, diabetes, moderate/severe nephropathy, liver dysfunction, tumor, leukemia, lymphoma, and AIDS through forward likelihood ratio method. AIDS: acquired immune deficiency syndrome, CAR: c-reactive protein-to-albumin ratio, CBVD: cerebral vascular disease, CHF: congestive heart failure, CI, confidence interval, COPD: chronic obstructive pulmonary disease, CTD: connective tissue disease, HR: hazard ratio, MI: myocardial infarction, NLR: neutrophil-to-lymphocyte ratio, PLR: platelet-to-lymphocyte ratio, PVD: peripheral vascular disease, UD: ulcer disease.

## **Supplementary Table 6. Subgroup analyses for the primary outcome for three scores.**

| Supplementary Table 6. Subgroup analyses for the primary outcome for three scores. | | |
| --- | --- | --- |
| NLR | *P for trend* | *P for interaction* |
| CAD |  | |
| ACS, N=25 | 0.240 | 0.691 |
| CCS, N=240 | 0.047 |
| CAR |  |  |
| CAD |  | |
| ACS, N=25 | 0.048 | 0.369 |
| CCS, N=240 | 0.010 |
| PLR |  |  |
| CAD |  | |
| ACS, N=25 | 0.216 | 0.242 |
| CCS, N=240 | 0.185 |

Supplementary Table 6. Subgroup analyses for the primary outcome for three scores. Analyses were adjusted for NLR, CAR, PLR, congestive heart failure, and nephropathy. ACS: acute coronary syndrome, CAD: coronary artery disease, CAR: c-reactive protein-to-albumin ratio, CCS: chronic coronary syndrome, CI, confidence interval, NLR: neutrophil-to-lymphocyte ratio, HR, hazard ratio, PLR: platelet-to-lymphocyte ratio.

## **Supplementary Table 7. Clinical characteristics of propensity score matched patient pairs based on NLR**

| Supplementary Table 7. Clinical characteristics of propensity score matched patient pairs based on NLR | | | | |
| --- | --- | --- | --- | --- |
|  | NLR | | Standardized Difference | |
| < Median (n=102) | > Median (n=102) | Before | After |
| Age, years | 88 (79-90) | 87 (78.75-91) | 0.342 | -0.029 |
| Female sex, no. (%) | 41 (40.2) | 40 (39.2) | -0.131 | -0.020 |
| Previous MI, no. (%) | 8 (7.8) | 9 (8.8) | --0.112 | 0.035 |
| CHF, no. (%) | 64 (62.7) | 64 (62.7) | 0.294 | <0.001 |
| PVD, no. (%) | 18 (17.6) | 18 (17.6) | 0.095 | <0.001 |
| CBVD, no. (%) | 38 (37.3) | 39 (38.2) | 0.042 | 0.021 |
| Hemiplegia, no. (%) | 1 (1.0) | 1 (1.0) | -0.088 | <0.001 |
| Dementia, no. (%) | 20 (19.6) | 19 (18.6) | 0.017 | -0.026 |
| COPD/asthma, no. (%) | 27 (26.5) | 24 (23.5) | -0.133 | -0.072 |
| CTD, no. (%) | 4 (3.9) | 3 (2.9) | 0.100 | -0.044 |
| UD, no. (%) | 1 (1.0) | 1 (1.0) | -0.001 | <0.001 |
| Hypertension, no. (%) | 77 (75.5) | 75 (73.5) | 0.004 | -0.045 |
| Diabetes, no. (%) |  |  |  |  |
| Without complication | 60 (58.8) | 54 (52.9) | -0.197 | <0.001 |
| With complications | 20 (19.6) | 26 (25.5) | 0.223 | 0.136 |
| Moderate/severe nephropathy, no. (%) | 43 (42.2) | 52 (51) | 0.402 | 0.177 |
| Liver dysfunction, no. (%) |  |  |  |  |
| Mild | 8 (7.8) | 8 (7.8) | -0.002 | <0.001 |
| Moderate/severe | 1 (1.0) | 1 (1.0) | -0.088 | <0.001 |
| Tumor, no. (%) |  |  |  |  |
| No metastasis | 12 (11.8) | 13 (12.7) | -0.027 | 0.032 |
| Metastasis | 6 (5.9) | 5 (4.9) | -0.002 | -0.044 |
| Leukemia, no. (%) | 0 (0) | 0 (0) | - | - |
| Lymphoma, no. (%) | 1 (1.0) | 1 (1.0) | -0.001 | <0.001 |
| AIDS, no. (%) | 0 (0) | 0 (0) | 0.087 | <0.001 |

Supplementary Table 7. Clinical characteristics of propensity score matched patient pairs based on NLR. AIDS: acquired immune deficiency syndrome, CBVD: cerebral vascular disease, CHF: congestive heart failure, COPD: chronic obstructive pulmonary disease, CTD: connective tissue disease, MI: myocardial infarction, NLR: neutrophil-to-lymphocyte ratio, PVD: peripheral vascular disease, UD: ulcer disease. Values are numbers (%) or medians (interquartile ranges).

## **Supplementary Table 8. Clinical characteristics of propensity score matched patient pairs based on CAR**

| Supplementary Table 8. Clinical characteristics of propensity score matched patient pairs based on CAR | | | | |
| --- | --- | --- | --- | --- |
|  | CAR | | Standardized Difference | |
| < Median (n=93) | > Median (n=93) | Before | After |
| Age, years | 88 (76.5-91) | 87 (77.5-91) | 0.146 | 0.015 |
| Female sex, no. (%) | 36 (38.7) | 37 (39.8) | -0.444 | 0.024 |
| Previous MI, no. (%) | 10 (10.8) | 10 (10.8) | -0.044 | <0.001 |
| CHF, no. (%) | 55 (59.1) | 59 (63.4) | 0.441 | 0.094 |
| PVD, no. (%) | 14 (15.1) | 17 (18.3) | 0.069 | 0.084 |
| CBVD, no. (%) | 32 (34.4) | 29 (31.2) | -0.032 | --0.068 |
| Hemiplegia, no. (%) | 0 (0) | 0 (0) | 0.063 | <0.001 |
| Dementia, no. (%) | 15 (16.1) | 16 (17.2) | 0.069 | 0.028 |
| COPD/asthma, no. (%) | 24 (25.8) | 21 (22.6) | -0.115 | -0.078 |
| CTD, no. (%) | 4 (4.3) | 4 (4.3) | 0.040 | <0.001 |
| UD, no. (%) | 1 (1.1) | 1 (1.1) | 0.002 | <0.001 |
| Hypertension, no. (%) | 71 (76.3) | 71 (76.3) | -0.013 | <0.001 |
| Diabetes, no. (%) |  |  |  |  |
| Without complication | 22 (23.7) | 2 (23.7) | 0.116 | <0.001 |
| With complications | 18 (19.4) | 17 (18.3) | -0.259 | -0.030 |
| Moderate/severe nephropathy, no. (%) | 39 (41.9) | 37 (39.8) | 0.036 | -0.043 |
| Liver dysfunction, no. (%) |  |  |  |  |
| Mild | 4 (4.3) | 1 (1.1) | 0.281 | -0.098 |
| Moderate/severe | 1 (1.1) | 1 (1.1) | -0.083 | <0.001 |
| Tumor, no. (%) |  |  |  |  |
| No metastasis | 9 (9.7) | 7 (7.5) | -0.246 | -0.081 |
| Metastasis | 3 (3.2) | 5 (5.4) | 0.005 | 0.095 |
| Leukemia, no. (%) | 0 (0) | 0 (0) | - | - |
| Lymphoma, no. (%) | 0 (0) | 1 (1.1) | 0.002 | 0.123 |
| AIDS, no. (%) | 0 (0) | 0 (0) | - | - |

Supplementary Table 8. Clinical characteristics of propensity score matched patient pairs based on CAR. AIDS: acquired immune deficiency syndrome, CBVD: cerebral vascular disease, CAR: c-reactive protein-to-albumin ratio, CHF: congestive heart failure, COPD: chronic obstructive pulmonary disease, CTD: connective tissue disease, MI: myocardial infarction, PVD: peripheral vascular disease, UD: ulcer disease. Values are numbers (%) or medians (interquartile ranges).

## **Supplementary Table 9. Clinical characteristics of propensity score matched patient pairs based on PLR**

| Supplementary Table 9. Clinical characteristics of propensity score matched patient pairs based on PLR | | | | |
| --- | --- | --- | --- | --- |
|  | PLR | | Standardized Difference | |
| < Median (n=109) | > Median (n=109) | Before | After |
| Age, years | 88 (76.5-91) | 85 (77-91) | 0.081 | -0.051 |
| Female sex, no. (%) | 39 (35.8) | 48 (44) | 0.266 | 0.165 |
| Previous MI, no. (%) | 11 (10.1) | 10 (9.2) | -0.002 | -0.031 |
| CHF, no. (%) | 65 (59.6) | 64 (58.7) | 0.068 | -0.019 |
| PVD, no. (%) | 18 (16.5) | 17 (15.6) | 0.017 | -0.025 |
| CBVD, no. (%) | 35 (32.1) | 39 (35.8) | -0.054 | 0.078 |
| Hemiplegia, no. (%) | 0 (0) | 1 (0.9) | -0.088 | 0.106 |
| Dementia, no. (%) | 17 (15.6) | 18 (16.5) | 0.132 | 0.023 |
| COPD/asthma, no. (%) | 28 (25.7) | 26 (23.9) | -0.095 | -0.044 |
| CTD, no. (%) | 5 (4.6) | 6 (5.5) | 0.035 | 0.044 |
| UD, no. (%) | 1 (0.9) | 1 (0.9) | -0.001 | <0.001 |
| Hypertension, no. (%) | 80 (73.4) | 80 (73.4) | 0.112 | <0.001 |
| Diabetes, no. (%) |  |  |  |  |
| Without complication | 25 (22.9) | 22 (20.2) | -0.156 | -0.069 |
| With complications | 22 (20.2) | 21 (19.3) | -0.062 | -0.023 |
| Moderate/severe nephropathy, no. (%) | 48 (44.0) | 46 (42.2) | 0.098 | -0.037 |
| Liver dysfuction, no. (%) |  |  |  |  |
| Mild | 5 (4.6) | 7 (6.4) | -0.205 | 0.082 |
| Moderate/severe | 1 (0.9) | 1 (0.9) | 0.061 | <0.001 |
| Tumor, no. (%) |  |  |  |  |
| No metastasis | 13 (11.9) | 13 (11.9) | 0.067 | <0.001 |
| Metastasis | 5 (4.6) | 5 (4.6) | 0.118 | <0.001 |
| Leukemia, no. (%) | 0 (0) | 0 (0) | 0.087 | <0.001 |
| Lymphoma, no. (%) | 1 (0.9) | 1 (0.9) | -0.001 | <0.001 |
| AIDS, no. (%) | 0 (0) | 0 (0) | - | - |

Supplementary Table 8. Clinical characteristics of propensity score matched patient pairs based on PLR. AIDS: acquired immune deficiency syndrome, CBVD: cerebral vascular disease, CHF: congestive heart failure, COPD: chronic obstructive pulmonary disease, CTD: connective tissue disease, MI: myocardial infarction, PLR: platelet-to-lymphocyte ratio, PVD: peripheral vascular disease, UD: ulcer disease. Values are numbers (%) or medians (interquartile ranges).

## **Supplementary Table 10. Clinical characteristics of NLR, CAR, and PLR stratification in post hoc analysis**

| Supplementary Table 10. Clinical characteristics of NLR, CAR, and PLR stratification in post hoc analysis | | | | | | | | | | | | | | | |
| --- | --- | --- | --- | --- | --- | --- | --- | --- | --- | --- | --- | --- | --- | --- | --- |
|  | NLR | | | | *P* | CAR | | | | *P* | PLR | | | | *P* |
| Q1  (<2.65)  (N=66) | Q2  (2.65-4.49)  (N=66) | Q3  (4.49-8.74)  (N=67) | Q4  (≥8.74)  (N=66) | Q1  (<0.11)  (N=68) | Q2  (0.11-0.38)  (N=66) | Q3  (0.38-1.44)  (N=64) | Q4  (≥1.44)  (N=67) | Q1  (<132.41)  (N=66) | Q2 (132.41-195.83) (N=66) | Q3 (195.83-323.69) N=(67) | Q4  (≥323.69)  (N=66) |
| Previous PCI, no. (%) | 22 (33.3) | 18 (27.3) | 17 (25.4) | 11 (16.7)) | 0.177 | 19 (27.9) | 12 (18.2) | 17 (26.6) | 20 (29.9) | 0.429 | 18 (27.3) | 23 (34.8) | 13 (19.4) | 14 (21.2) | 0.167 |
| Aspirin, no. (%) | 14 (21.2) | 17 (25.8) | 12 (17.9) | 12 (18.2) | 0.658 | 16 (23.5) | 7 (10.6) | 14 (21.9) | 18 (26.9) | 0.111 | 14 (21.2) | 13 (19.7) | 15 (22.4) | 13 (19.7) | 0.976 |
| P2Y12 receptor inhibitor, no. (%) | 25 (37.9) | 30 (45.5) | 23 (34.3) | 23 (34.8) | 0.529 | 34 (50) | 28 (42.4) | 19 (29.7) | 20 (29.9) | 0.037 | 28 (42.4) | 27 (40.9) | 19 (28.4) | 27 (40.9) | 0.301 |
| ACEI or ARB, no. (%) | 25 (37.9) | 30 (45.5) | 24 (35.8) | 17 (25.8) | 0.130 | 25 (36.8) | 24 (36.4) | 28 (43.8) | 19 (28.4) | 0.338 | 26 (39.4) | 25 (37.9) | 22 (32.8) | 23 (34.8) | 0.861 |
| Beta-blocker, no. (%) | 28 (42.4) | 32 (48.5) | 33 (49.3) | 30 (45.5) | 0.855 | 33 (48.5) | 31 (47) | 29 (45.3) | 30 (44.8) | 0.972 | 31 (47) | 30 (45.5) | 28 (41.8) | 34 (51.5) | 0.729 |
| Calcium-channel blocker, no. (%) | 33 (50) | 25 (37.9) | 27 (40.3) | 30 (45.5) | 0.500 | 32 (47.1) | 28 (42.4) | 24 (37.5) | 31(46.3) | 0.676 | 27 (40.9) | 32 (48.5) | 24 (35.8) | 32 (48.5) | 0.373 |
| Lipid-lowering agent, no. (%) | 37 (56.1) | 42 (63.6) | 36 (53.7) | 34 (51.5) | 0.525 | 39 (57.4) | 39 (59.1) | 37 (57.8) | 34 (50.7) | 0.768 | 35 (53) | 38 (57.6) | 40 (59.7) | 36 (54.5) | 0.867 |

Supplementary Table 10. Clinical characteristics of NLR, CAR, and PLR stratification in post hoc analysis. ACEI: angiotensin converting enzyme inhibitor, ARB: angiotensin receptor blocker, CAR: C-reactive protein-to-albumin ratio, NLR: neutrophil-to-lymphocyte ratio, PLR: platelet-to-lymphocyte ratio, PCI: percutaneous coronary intervention. Values are numbers (%) or medians (interquartile ranges).

## **Supplementary Table 11. Cox regression analysis of all-cause death during hospitalization using post hoc analysis model**

| Supplementary Table 11. Cox regression analysis of all-cause death during hospitalization using post hoc analysis model | | | | |  |
| --- | --- | --- | --- | --- | --- |
|  | NLR, HR (95% Cl) | | | | |
| Outcomes | Q1  (<2.65)  (N=66) | Q2  (2.65-4.49)  (N=66) | Q3  (4.49-8.74)  (N=67) | Q4  (≥8.74)  (N=66) | P for trend |
| All-cause death |  |  |  |  |  |
| Post hoc analysis model | 1.000 (Reference) | 1.268 (0.275-5.843) | 1.228 (0.291-5.187) | 1.310 (0.255-6.728) | 0.562 |
|  | CAR, HR (95% Cl) | | | | |
| All-cause death | Q1  (<0.11)  (N=68) | Q2  (0.11-0.38)  (N=66) | Q3  (0.38-1.44)  (N=64) | Q4  (≥1.44)  (N=67) | P for trend |
| Post hoc analysis model | 1.000 (Reference) | 7.407 (0.825-66.493) | 7.687 (0.824-71.714) | 17.855 (2.137-149.166) | <0.001 |
|  | PLR, HR (95% Cl) | | | | |
| All-cause death | Q1  (<132.41)  (N=66) | Q2 (132.41-195.83)(N=66) | Q3 (195.83-323.69)N=(67) | Q4  (≥323.69)  (N=66) | P for trend |
| Post hoc analysis model | 1.000 (Reference) | 1.070 (0.333-3.435) | 0.639 (0.163-2.499) | 1.647 (0.482-5.632) | 0.647 |

Supplementary Table 11. Cox regression analysis of all-cause death during hospitalization using a post hoc analysis model. Post hoc analysis model was adjusted for NLR (categorical covariates), CAR (categorical covariates), PLR (categorical covariates), congestive heart failure, moderate/severe nephropathy, previous percutaneous coronary intervention, aspirin, P2Y12 receptor inhibitor, angiotensin converting enzyme inhibitor or angiotensin receptor blocker, beta-blocker, calcium-channel blocker, and lipid-lowering agent through. CAR: c-reactive protein-to-albumin ratio, CI: confidence interval, HR: hazard ratio, NLR: neutrophil-to-lymphocyte ratio, PLR: platelet-to-lymphocyte ratio.

## **Supplementary Table 12. Cox regression analysis of all-cause death during hospitalization after removal of CAR**

| Variable | HR | Multivariate analysis* for 95% CI | *P* |
| --- | --- | --- | --- |
| NLR (*P for trend*) | 1.618 | 1.124-2.331 | 0.010 |
| PLR (*P for trend*) | - | - | 0.525 |
| Age | - | - | 0.250 |
| Sex | - | - | 0.224 |
| Previous MI | - | - | 0.188 |
| CHF | 3.972 | 1.204-13.105 | 0.024 |
| PVD | - | - | 0.931 |
| CBVD | - | - | 0.068 |
| Hemiplegia | - | - | 0.528 |
| Dementia | - | - | 0.809 |
| COPD/asthma | - | - | 0.858 |
| CTD | - | - | 0.227 |
| UD | - | - | 0.226 |
| Hypertension | - | - | 0.414 |
| Diabetes | - | - | 0.435 |
| Moderate/severe nephropathy | 3.322 | 1.348-8.178 | 0.009 |
| Liver dysfunction | 2.109 | 1.168-3.805 | 0.013 |
| Tumor | - | - | 0.283 |
| Leukemia | - | - | 0.958 |
| Lymphoma | - | - | 0.450 |
| AIDS | - | - | 0.603 |

Supplementary Table 12. Cox regression analysis of all-cause death during hospitalization after removal of CAR. *Adjusting NLR, PLR, age, sex, previous MI, CHF, PVD, CBVD, hemiplegia, dementia, COPD/asthma, CTD, UD, hypertension, diabetes, moderate/severe nephropathy, liver dysfunction, tumor, leukemia, lymphoma, and AIDS through forward likelihood ratio method. AIDS: acquired immune deficiency syndrome, CBVD: cerebral vascular disease, CHF: congestive heart failure, CI, confidence interval, COPD: chronic obstructive pulmonary disease, CTD: connective tissue disease, HR: hazard ratio, MI: myocardial infarction, NLR: neutrophil-to-lymphocyte ratio, PLR: platelet-to-lymphocyte ratio, PVD: peripheral vascular disease, UD: ulcer disease.
